# Supplementary material for: Synthesis and characterization of electroactive chitosan/gelatin/PEDOT:PSS hydrogels with mixed ionic–electronic conductivity for potential wound healing applications
Source: Royal Society of Chemistry journal article supplement (doi:10.1039/d5ra09790h), 2026-01-01
Supplement: d5ra09790h1.pdf [file d5ra09790h1.pdf]

### Supplementary 1

Illustration of linear scratch on 6-well plate for wound healing assay.

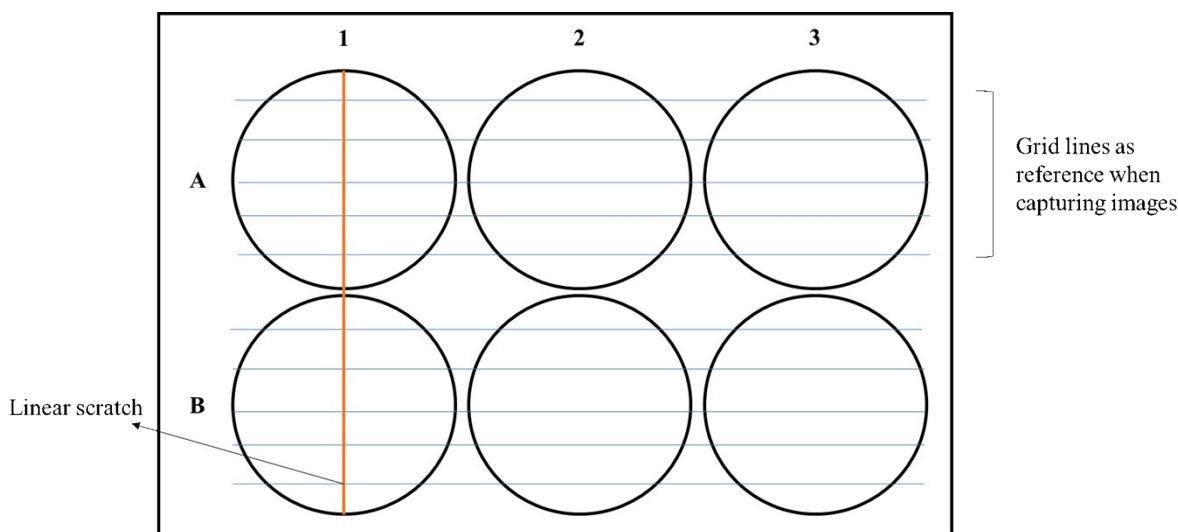

### Supplementary 2

The Measured Biodegradation Rate of (CGPP) Hydrogels.

| CGPP hydrogels type | Biodegradation rate (g min <sup>-1</sup> ) |
|---------------------|--------------------------------------------|
| CGPP-0              | 0.0008                                     |
| CGPP-1              | 0.0012                                     |
| CGPP-2              | 0.0014                                     |
| CGPP-3              | 0.0015                                     |
| CGPP-4              | 0.0014                                     |
| CGPP-5              | 0.0020                                     |
| CGPP-6              | 0.0026                                     |

### Supplementary 3

The Calculated Concentration of Hydrogels Released in PBS Solutions After 14 Days of Incubation

| CGPP hydrogels type released in PBS | Absorbance (a.u.) | Calculated concentration (mol/cm <sup>3</sup> ) |
|-------------------------------------|-------------------|-------------------------------------------------|
| CGPP-0                              | 0.3348            | 0.0018                                          |
| CGPP-1                              | 0.3767            | 0.0395                                          |
| CGPP-2                              | 0.4172            | 0.0760                                          |
| CGPP-3                              | 0.3801            | 0.0425                                          |
| CGPP-4                              | 0.4125            | 0.0718                                          |
| CGPP-5                              | 0.3524            | 0.0177                                          |

|        |        |        |
|--------|--------|--------|
| CGPP-6 | 0.3771 | 0.0399 |
|--------|--------|--------|

#### Supplementary 4

The measured mixed ionic–electronic conductivity values of CGPP hydrogels (mean  $\pm$  standard deviation) before incubation and after 1 and 2 weeks of incubation under physiological conditions.

| Hydrogels                       | Mean                  | Standard deviation        |
|---------------------------------|-----------------------|---------------------------|
| <b>Before Incubation</b>        |                       |                           |
| CGPP-0                          | $1.19 \times 10^{-3}$ | $\pm 0.07 \times 10^{-3}$ |
| CGPP-1                          | $8.32 \times 10^{-4}$ | $\pm 0.05 \times 10^{-4}$ |
| CGPP-2                          | $4.51 \times 10^{-4}$ | $\pm 0.03 \times 10^{-4}$ |
| CGPP-3                          | $1.51 \times 10^{-3}$ | $\pm 0.09 \times 10^{-3}$ |
| CGPP-4                          | $2.46 \times 10^{-3}$ | $\pm 0.15 \times 10^{-3}$ |
| CGPP-5                          | $5.49 \times 10^{-4}$ | $\pm 0.04 \times 10^{-4}$ |
| CGPP-6                          | $3.78 \times 10^{-4}$ | $\pm 0.03 \times 10^{-4}$ |
| <b>After 1-week incubation</b>  |                       |                           |
| CGPP-0                          | $1.13 \times 10^{-3}$ | $\pm 0.08 \times 10^{-3}$ |
| CGPP-1                          | $6.75 \times 10^{-4}$ | $\pm 0.05 \times 10^{-4}$ |
| CGPP-2                          | $4.21 \times 10^{-4}$ | $\pm 0.03 \times 10^{-4}$ |
| CGPP-3                          | $1.49 \times 10^{-3}$ | $\pm 0.10 \times 10^{-3}$ |
| CGPP-4                          | $2.49 \times 10^{-3}$ | $\pm 0.18 \times 10^{-3}$ |
| CGPP-5                          | $5.41 \times 10^{-4}$ | $\pm 0.04 \times 10^{-4}$ |
| CGPP-6                          | $3.20 \times 10^{-4}$ | $\pm 0.03 \times 10^{-4}$ |
| <b>After 2 weeks incubation</b> |                       |                           |
| CGPP-0                          | $8.47 \times 10^{-4}$ | $\pm 0.09 \times 10^{-4}$ |
| CGPP-1                          | $8.65 \times 10^{-4}$ | $\pm 0.07 \times 10^{-4}$ |
| CGPP-2                          | $4.21 \times 10^{-4}$ | $\pm 0.04 \times 10^{-4}$ |
| CGPP-3                          | $3.45 \times 10^{-4}$ | $\pm 0.05 \times 10^{-4}$ |
| CGPP-4                          | $4.74 \times 10^{-4}$ | $\pm 0.06 \times 10^{-4}$ |
| CGPP-5                          | $4.09 \times 10^{-4}$ | $\pm 0.04 \times 10^{-4}$ |
| CGPP-6                          | $2.69 \times 10^{-4}$ | $\pm 0.03 \times 10^{-4}$ |

**Supplementary 5**

The images of cells captured from microscope representing the condition of cells after 24 hours of CGPP hydrogels treatment

|         |                                                                                     |        |                                                                                      |
|---------|-------------------------------------------------------------------------------------|--------|--------------------------------------------------------------------------------------|
| control |    | CGPP-0 |    |
| CGPP-1  |   | CGPP-2 |   |
| CGPP-3  |  | CGPP-4 |  |
| CGPP-5  |  | CGPP-6 |  |

### **Supplementary 6**

The cellular morphology of cells captured from optical microscope after a 72-Hours incubation treatment with CGPP-4 hydrogels.

|                                                                                                        |                                                                                                            |
|--------------------------------------------------------------------------------------------------------|------------------------------------------------------------------------------------------------------------|
| <p>blank</p> 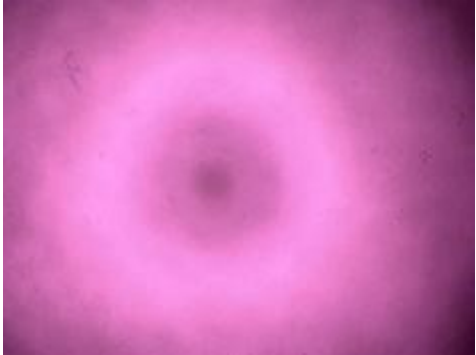         | <p>positive control</p>  |
| <p>7.8125 mg/mL</p>  | <p>15.625 mg/mL</p>     |
| <p>31.25 mg/mL</p>  | <p>62.5 mg/mL</p>      |
| <p>125.0 mg/mL</p>  | <p>250.0 mg/mL</p>     |

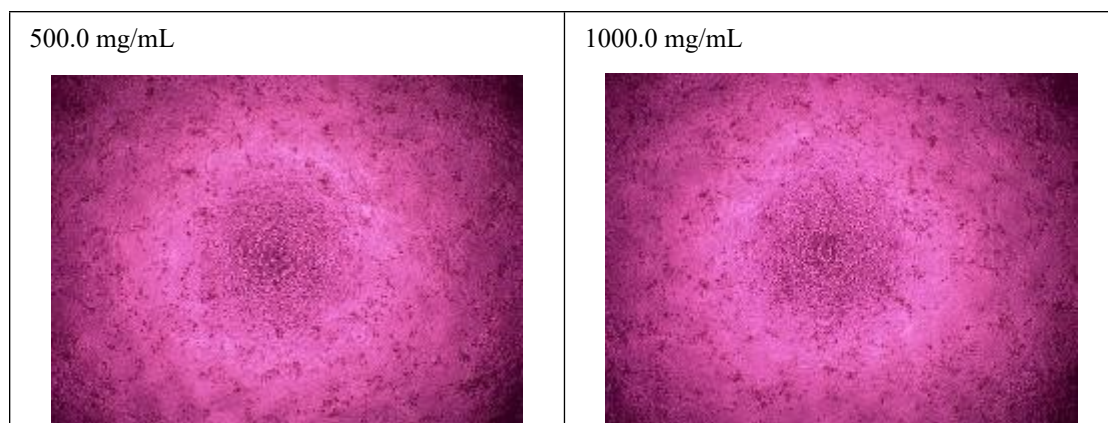

### Supplementary 7

The cellular morphology of keratinocytes tissues underwent healing process captured from optical microscope after at 0, 18 and 24-Hour incubation treatment with CGPP-4 hydrogels.



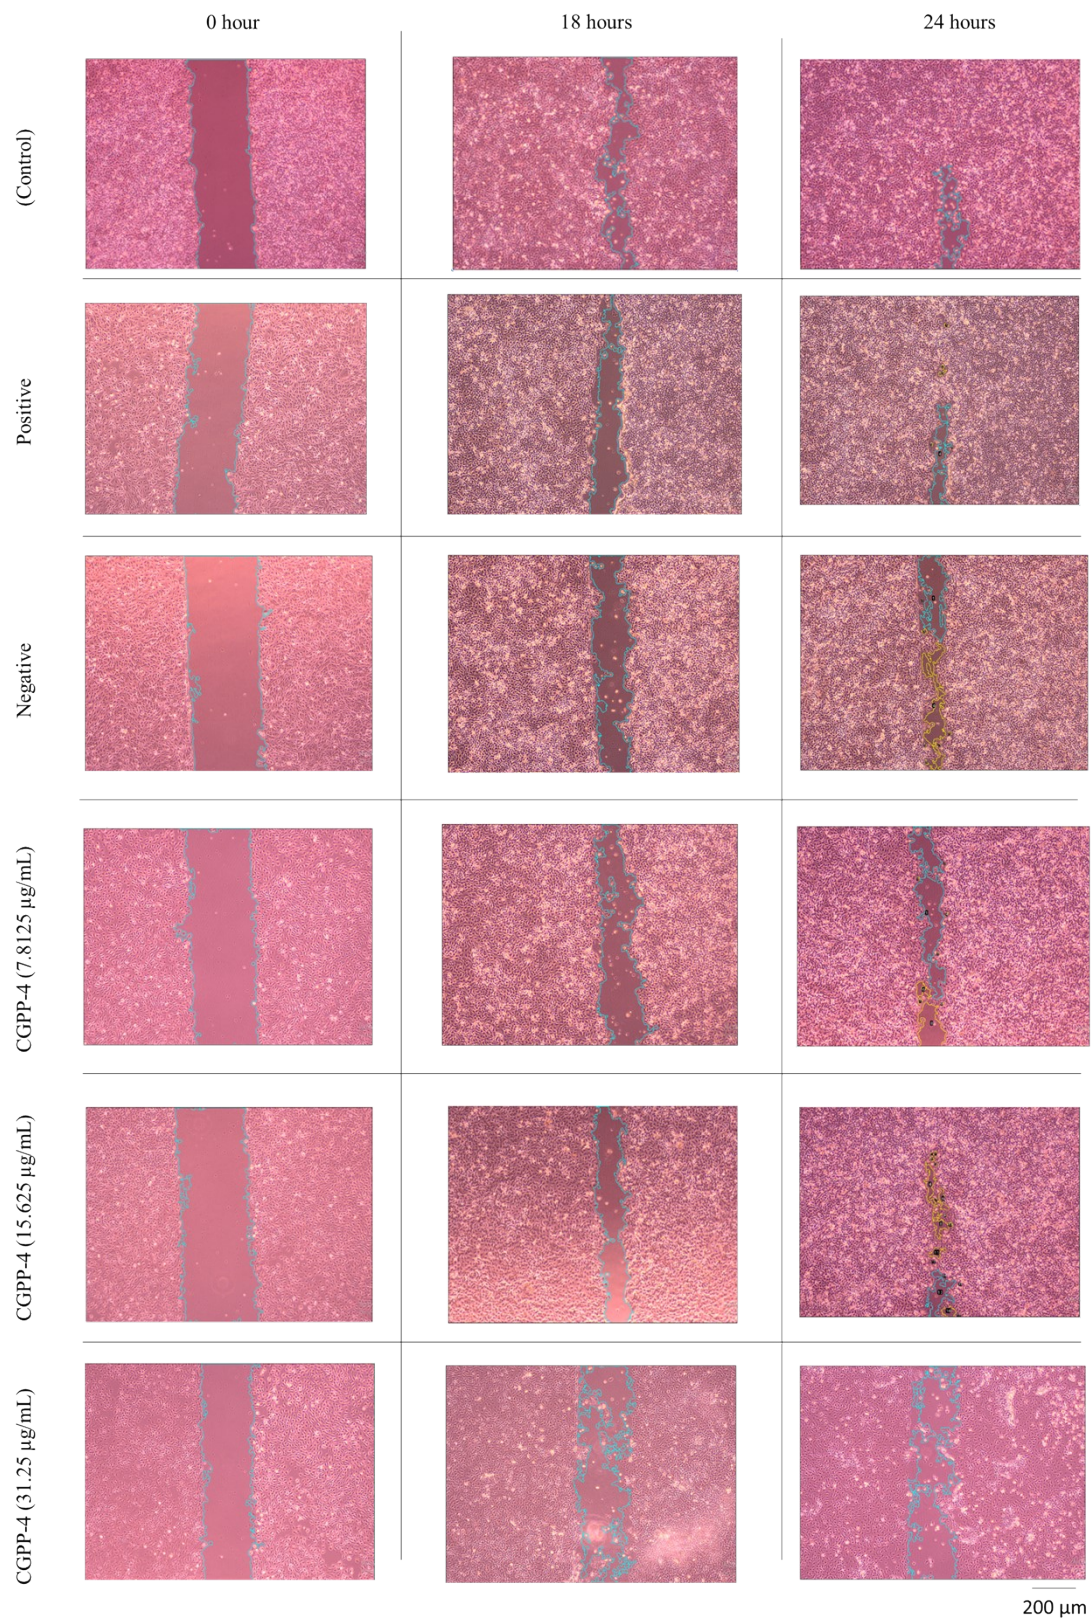

The cellular morphology of keratinocytes tissues underwent healing process captured from optical microscope after at 0, 18 and 24-Hour incubation treatment with CGPP-4-loaded curcumin hydrogels.



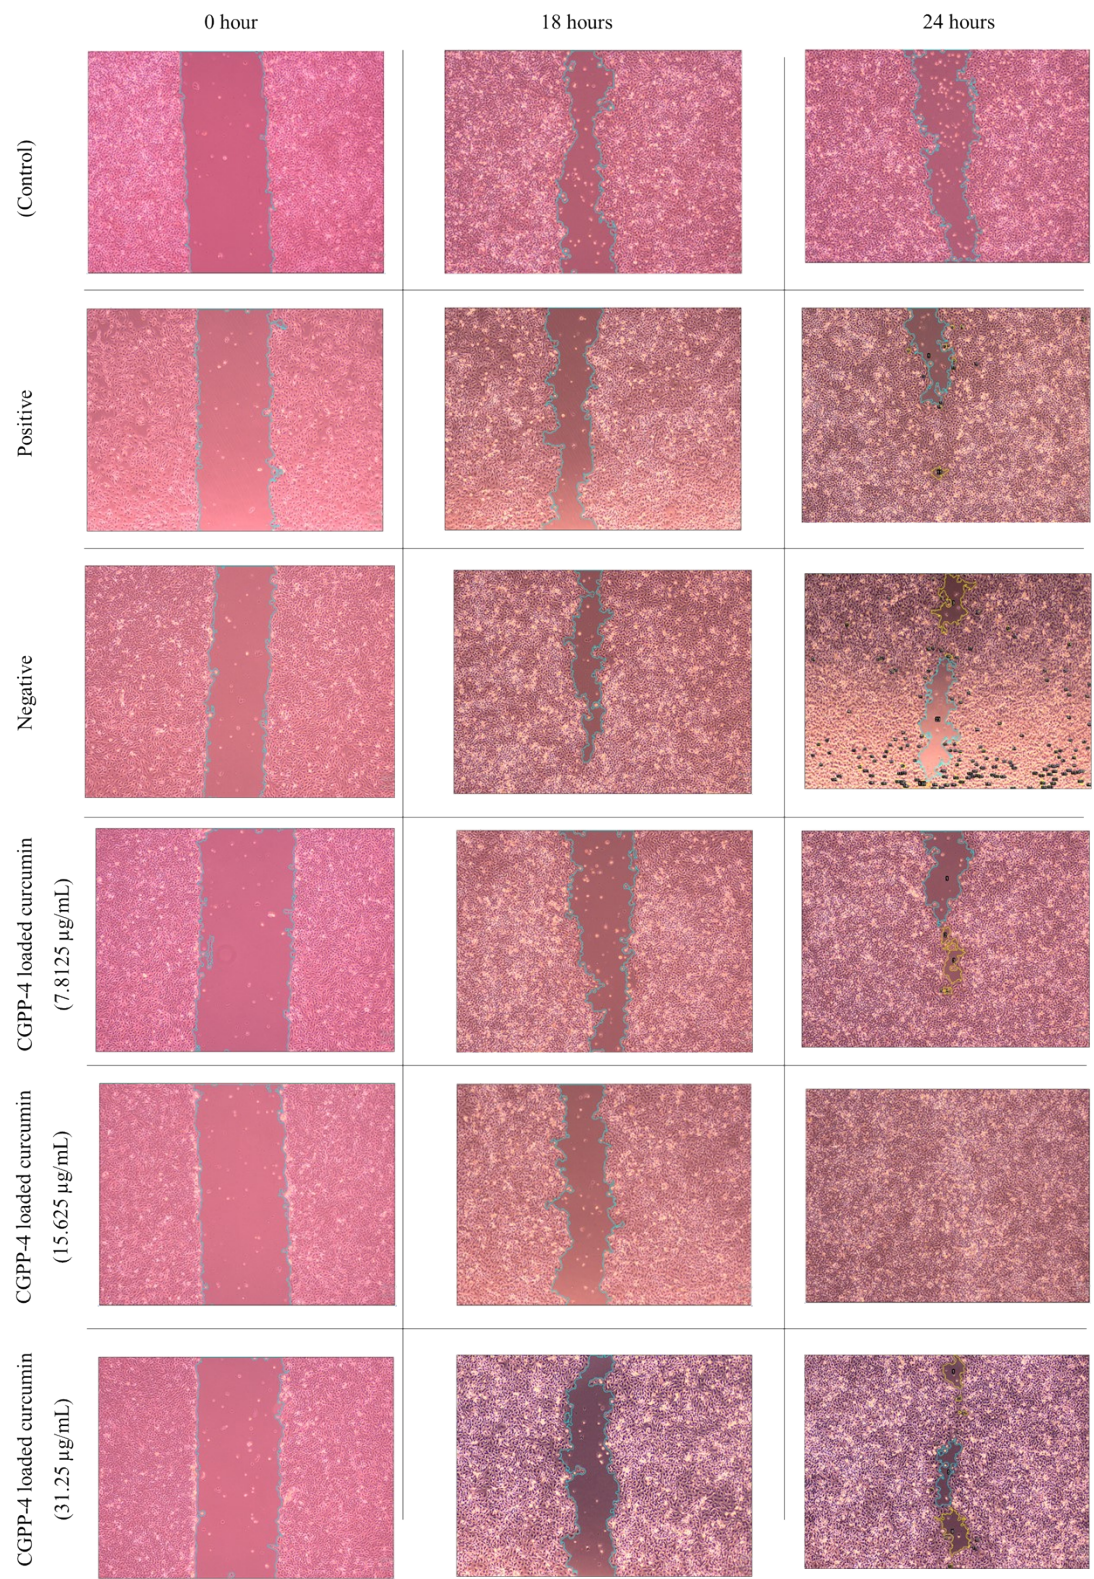

200  $\mu\text{m}$
